# Supplementary material
Source: PubMed Central journal article supplement (PMC3481843)
Supplement: NIHMS343816-supplement-1.pdf [file NIHMS343816-supplement-1.pdf]

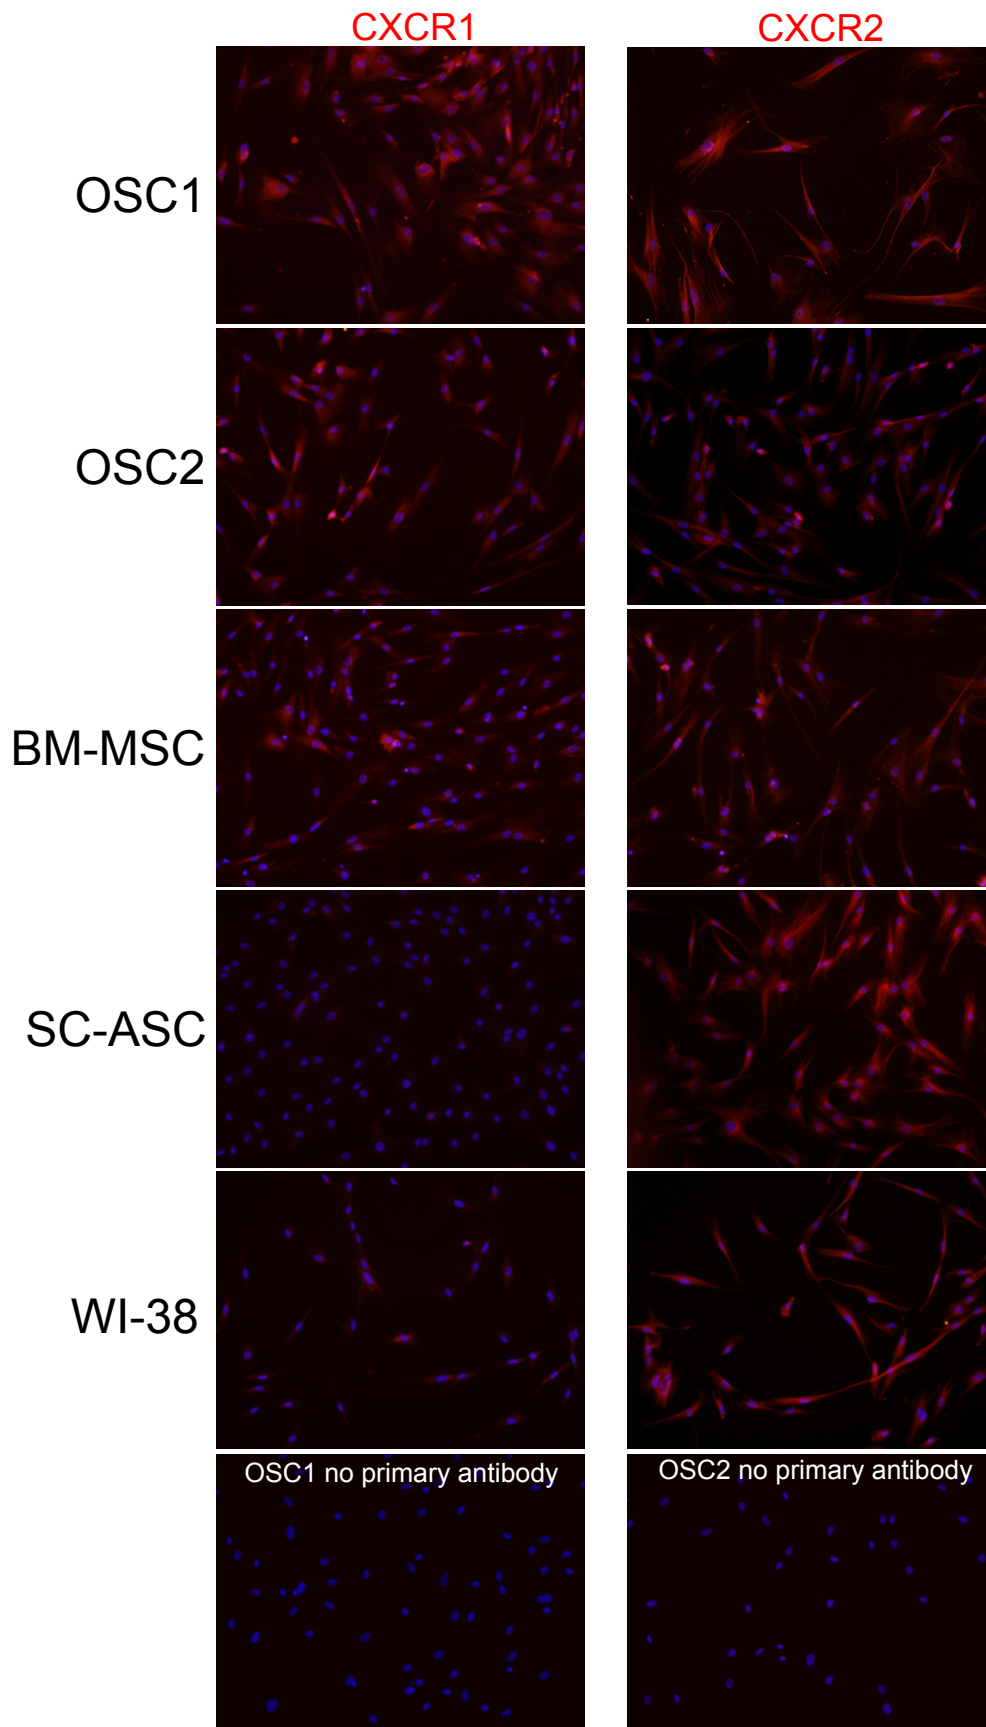

**Supplementary Fig. S8** Expression of IL8 / CXCL1 receptors in injected cells. Indicated cells were fixed, and subjected to immunofluorescence (without detergent permeabilization) with antibodies against CXCR1 and CXCR2 (Genetex). Secondary Cy-3-conjugated antibody signal is red. Nuclei are blue.
