# Supplementary material
Source: PubMed Central journal article supplement (PMC3481843)
Supplement: NIHMS343816-supplement-2.pdf [file NIHMS343816-supplement-2.pdf]

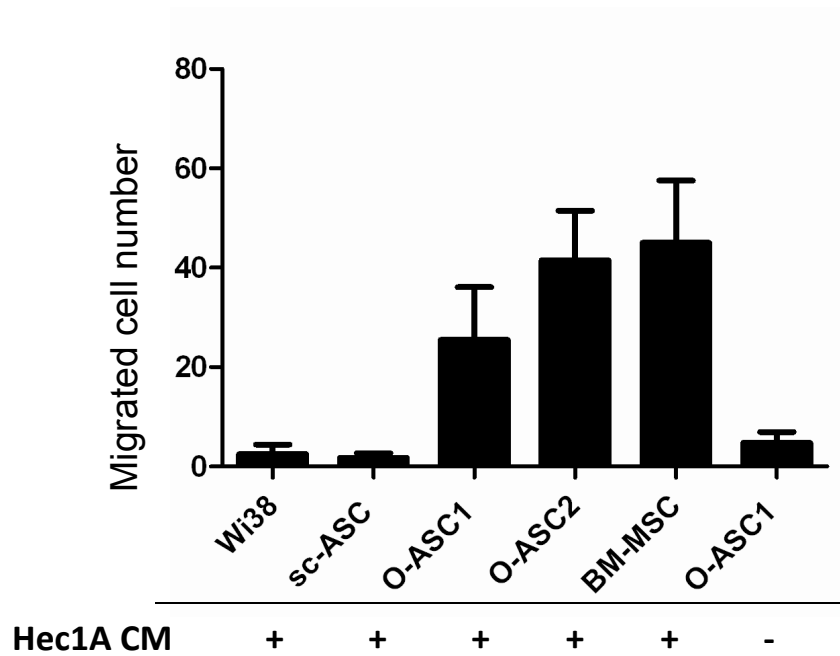

**Supplementary Fig. S6** Migration of stromal cells in response to Hec1a conditioned media. Migration assays were performed in transwell plates with 8  $\mu$ M pores in 48 hour conditioned Hec1a serum-free media. Quantification of migrated cells is shown with significantly ( $p < 0.05$ , Student's *T* test) more O-ASC and BM-MSC migrating in response to Hec1a-conditioned media as compared to SC-ASC and WI38 fibroblasts.
