# Supplementary material
Source: PubMed Central journal article supplement (PMC3481843)
Supplement: NIHMS343816-supplement-3.pdf [file NIHMS343816-supplement-3.pdf]

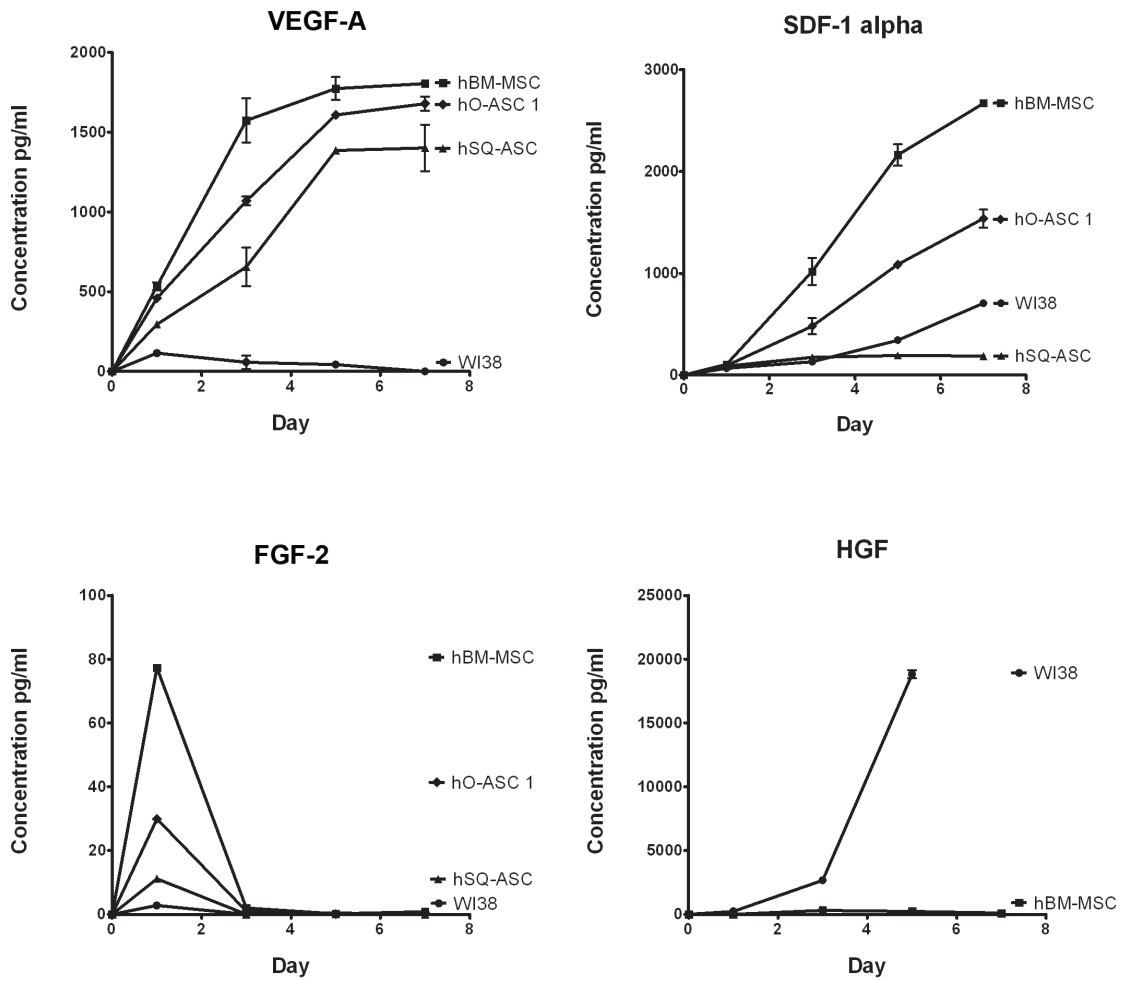

**Supplementary Fig. S5** Secretion of angiogenic cytokines from O-ASC, BM-MSC, SC-ASC and WI38. ELISA assays for VEGF-A, FGF-2, HGF and SDF-1 were performed on conditioned media from cultured stromal cells taken over seven days.
