# Supplementary material
Source: PubMed Central journal article supplement (PMC3481843)
Supplement: NIHMS343816-supplement-4.pdf [file NIHMS343816-supplement-4.pdf]

## Hec1a-conditioned medium

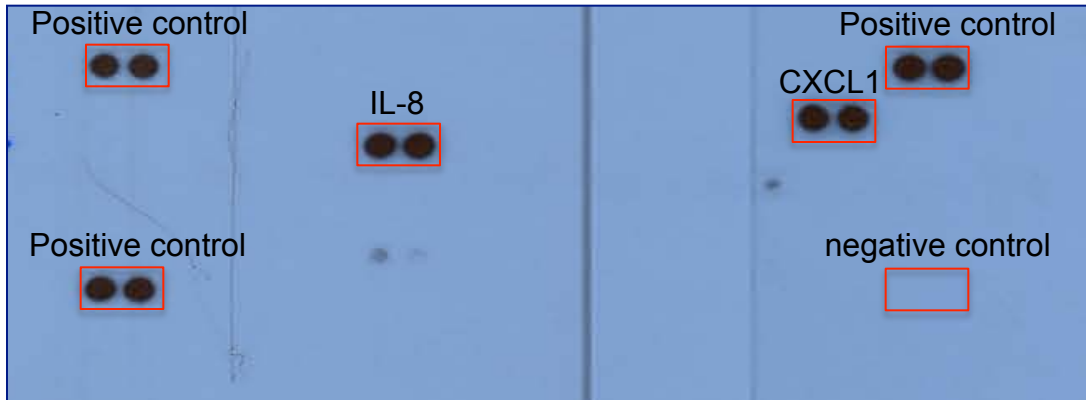

## Non-conditioned medium

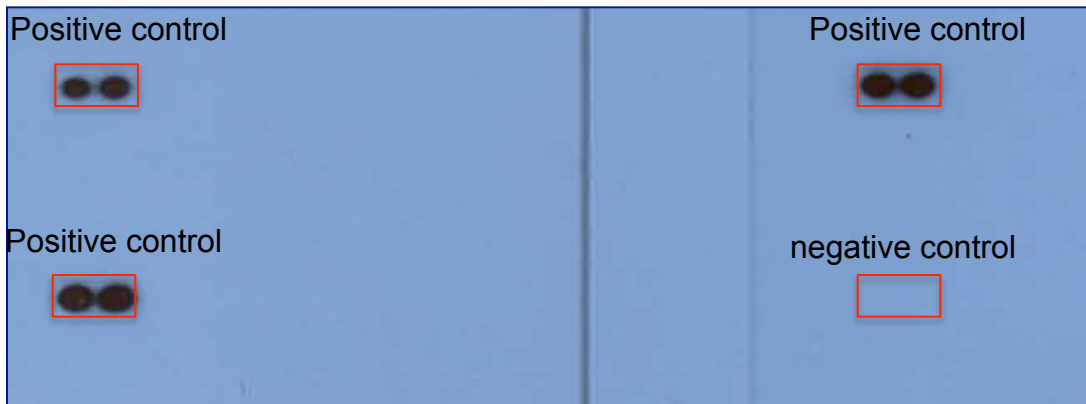

**Supplementary Fig. S7** Hec1a secrete IL8 and CXCL1. Proteome Profiler Human Chemokine Array Kit (R&D Systems) was used to analyze secretion of chemokines by Hec1a cell. Hec1a-conditioned a-MEM with 10% FBS (24h post-plating) or a-MEM with 10% FBS alone (non-conditioned medium) were analyzed. Blot exposure time: 5min. Hec1a cells secrete IL-8 and CXCL1, but not other 29 chemokines including: Chemerin, Fractalkine, Midkine, CCL1, CCL2, CCL3, CCL4, CCL5, CCL7, CCL14, CCL15, CCL17, CCL18, CCL19, CCL20, CCL21, CCL22, CCL26, CCL28, CXCL4, CXCL5, CXCL7, CXCL9, CXCL10, CXCL11, CXCL12 (SDF-1), CXCL16, CXCL17, Lymphotoxin, and IL-16.
