# Supplementary material
Source: PubMed Central journal article supplement (PMC3481843)
Supplement: NIHMS343816-supplement-5.pdf [file NIHMS343816-supplement-5.pdf]

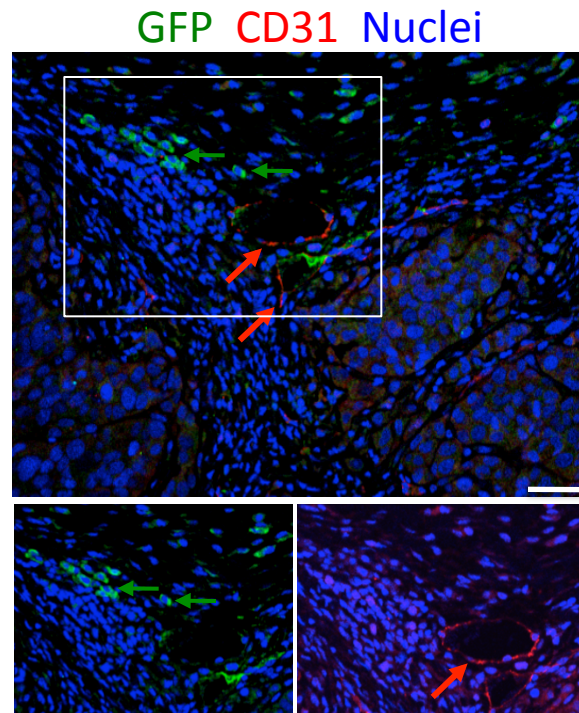

**Supplementary Fig. S2** O-ASC recruited by tumors do not differentiate into CD31 positive endothelial cells. Immunofluorescence analysis of tumor sections from O-ASC1-injected mice with goat anti-GFP antibodies (green) counter-stained in red with rabbit antibodies recognizing human / mouse CD31 (SC-1506-R, red) Nuclei are blue. Scale bar: 100  $\mu$ M.
