# Supplementary material
Source: PubMed Central journal article supplement (PMC3481843)
Supplement: NIHMS343816-supplement-7.pdf [file NIHMS343816-supplement-7.pdf]

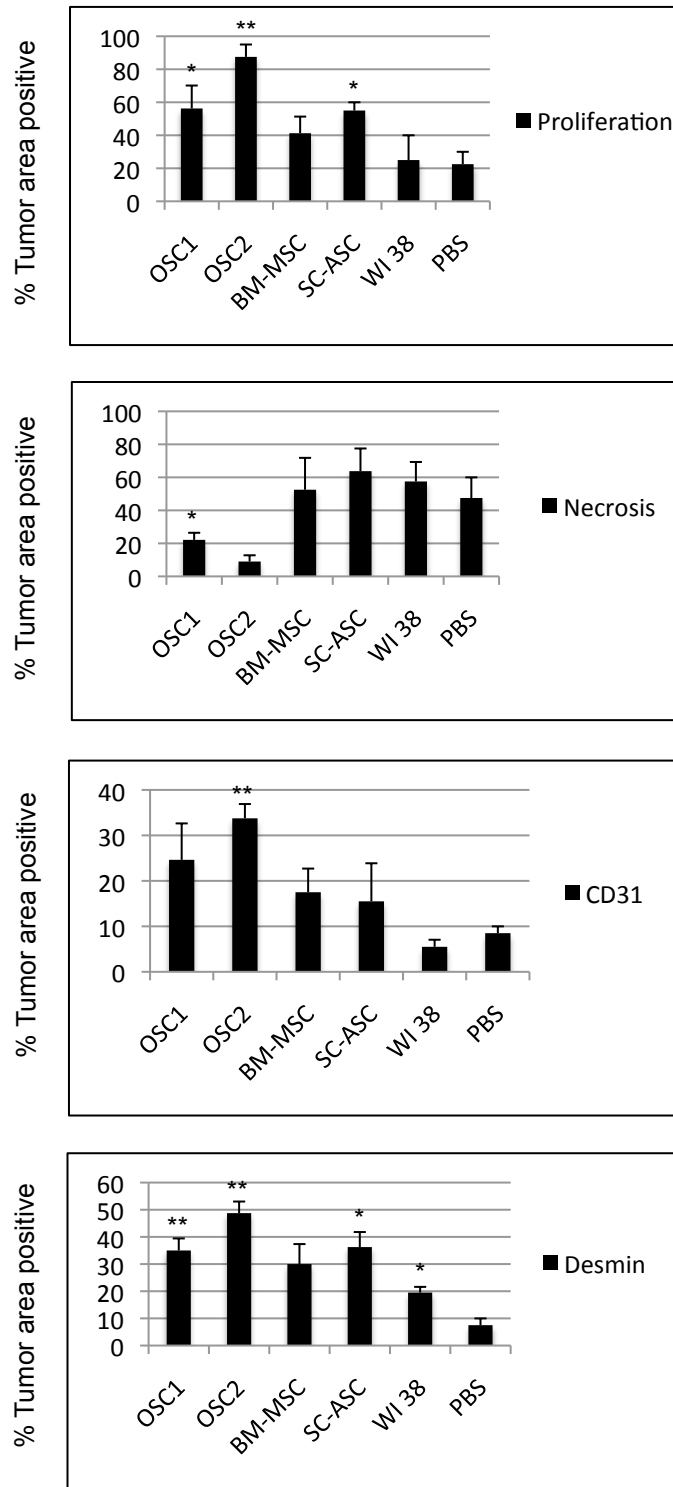

**Supplementary Fig. S3** Quantification of histological and immunofluorescence tissue analysis (Figs. 3-5). Three random internal tumor field views proximal to the capsule were inspected for each tumor at 100x magnification. In each field views, the proportion of the area positive for necrosis (Mason's trichrome anuclear pink staining), proliferation (containing Ki-67+ cells), vascularization (containing CD31+ vessels), and mature vasculature (containing desmin+ vessels) was calculated. Data were averaged from individual field views for each group. Error bars: standard deviation. \* p<0.05, \*\* p<0.01 compared with PBS group (Student's *T* test).
