# Supplementary material
Source: PubMed Central journal article supplement (PMC3481843)
Supplement: NIHMS343816-supplement-8.pdf [file NIHMS343816-supplement-8.pdf]

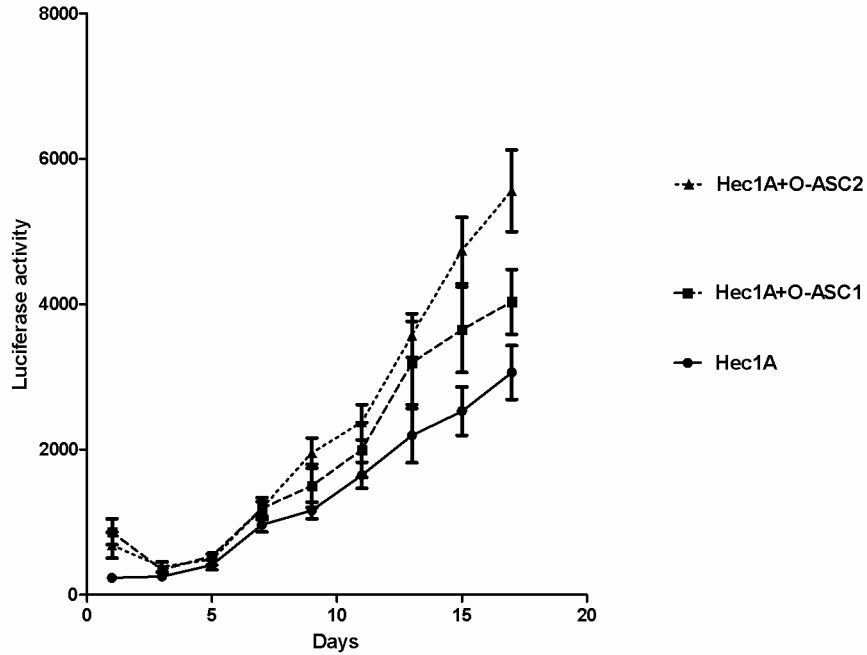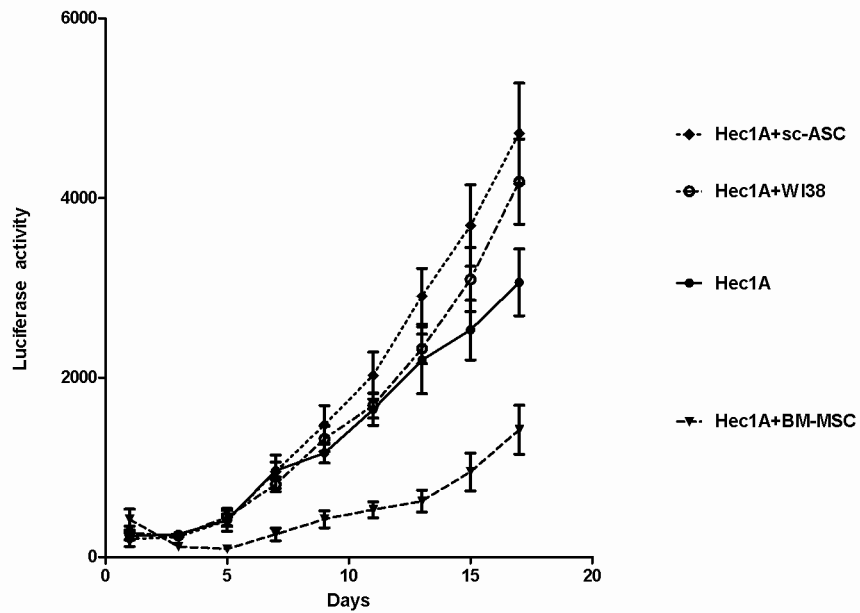

**Supplementary Fig. S4** Endometrial Hec1a cancer cell proliferation in co-culture with OSC, MSC, ASC and WI38 fibroblasts. Proliferation of Hec1a cells expressing renilla luciferase was quantified with bioluminescent imaging. Growth of endometrial cancer cells in the presence of O-ASC significantly ( $p < 0.01$ , Student's *T* test) increased Hec1a proliferation.
